# Supplementary material
Source: PubMed Central journal article supplement (PMC3630353)

Fig. 2C

*P1-ThPOK*

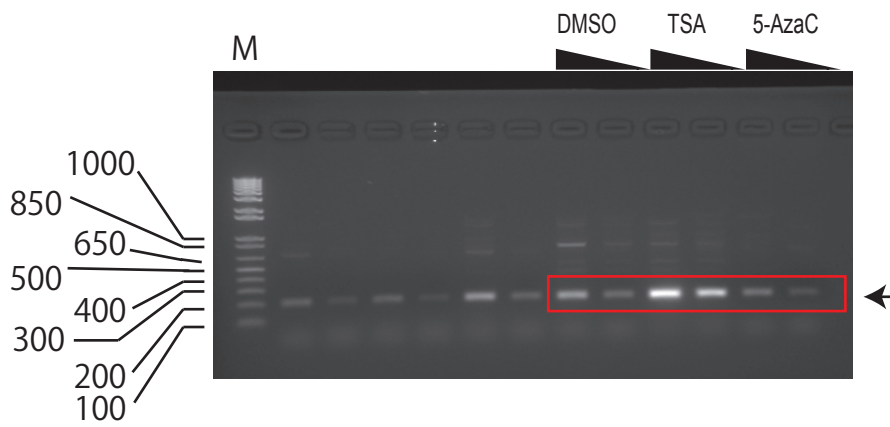

*b-actin*

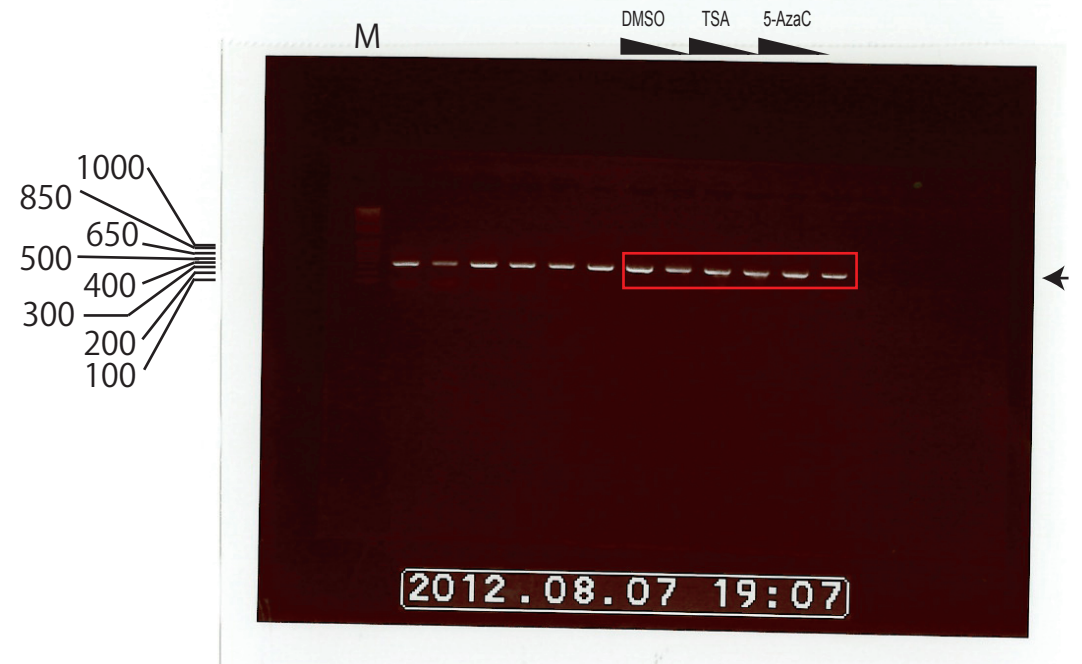

*P2-ThPOK*

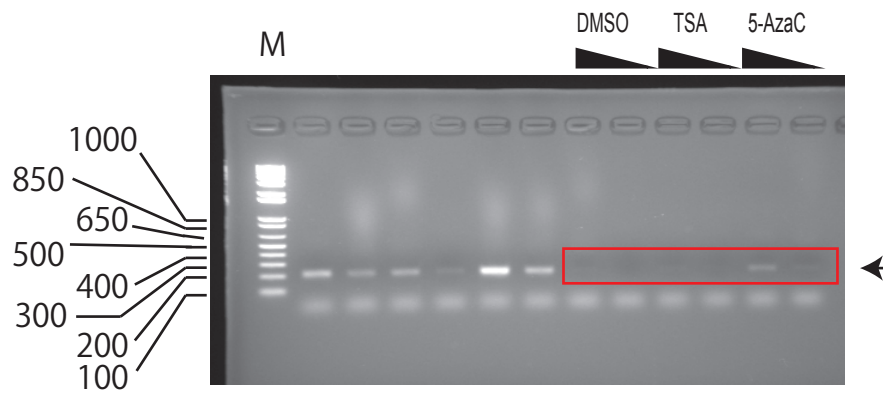

Supplement: emboj201347df2c.pdf [file emboj201347df2c.pdf]

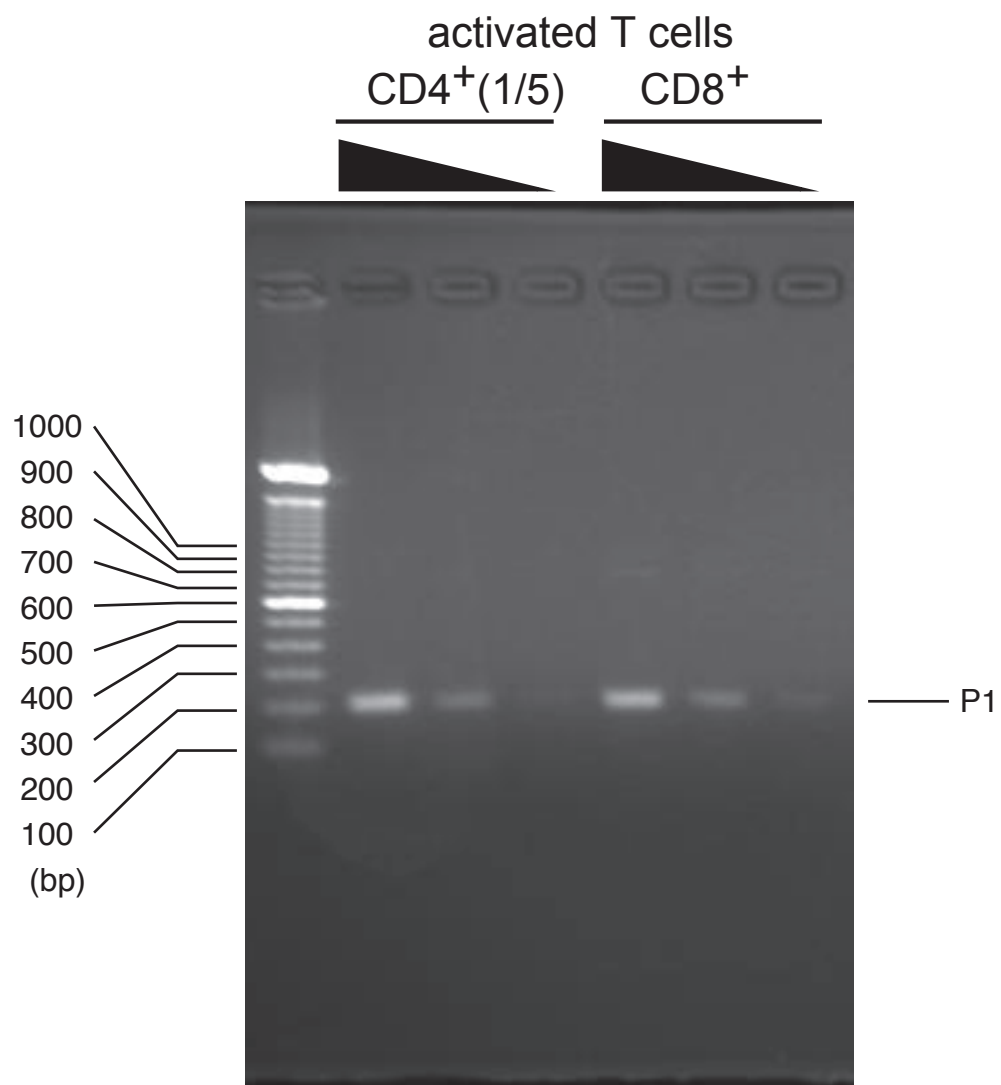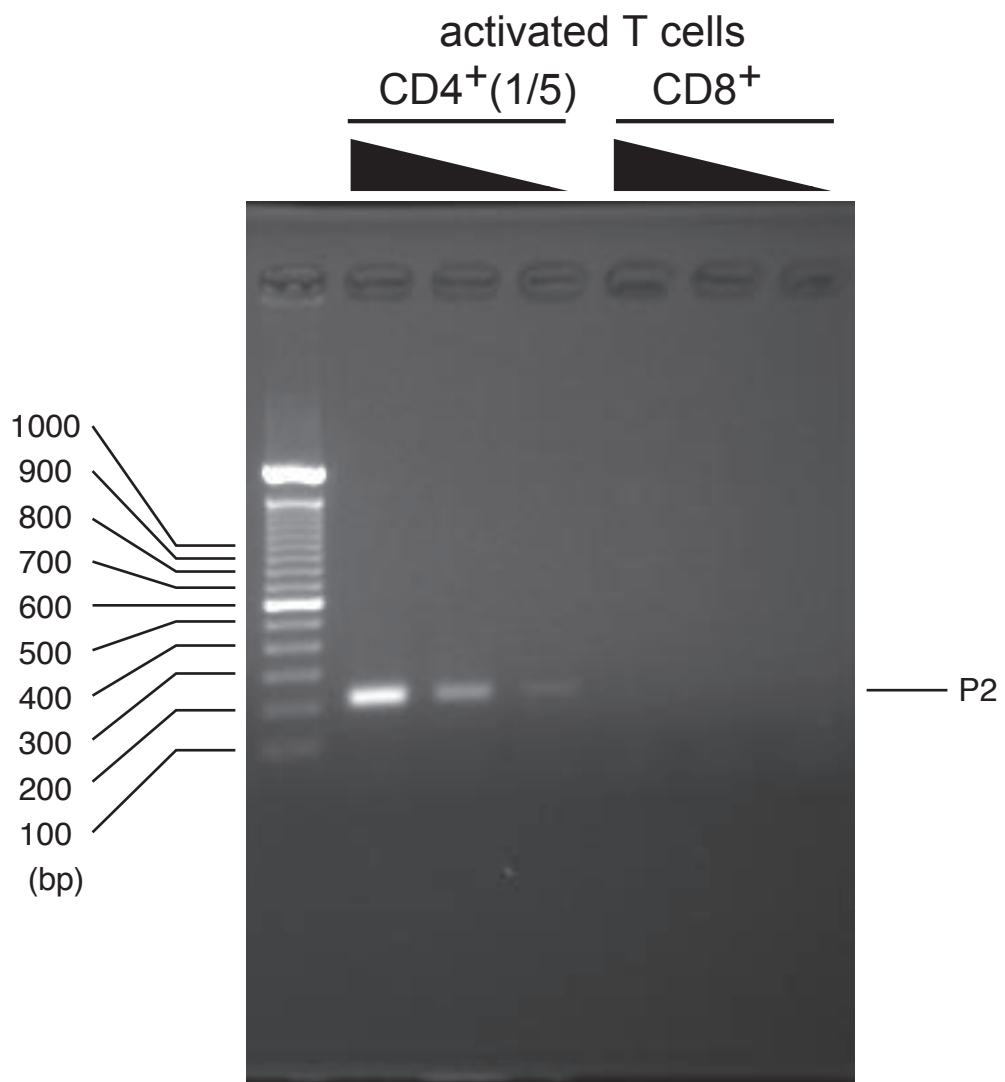

Supplement: emboj201347df3g.pdf [file emboj201347df3g.pdf]

Fig. 5D

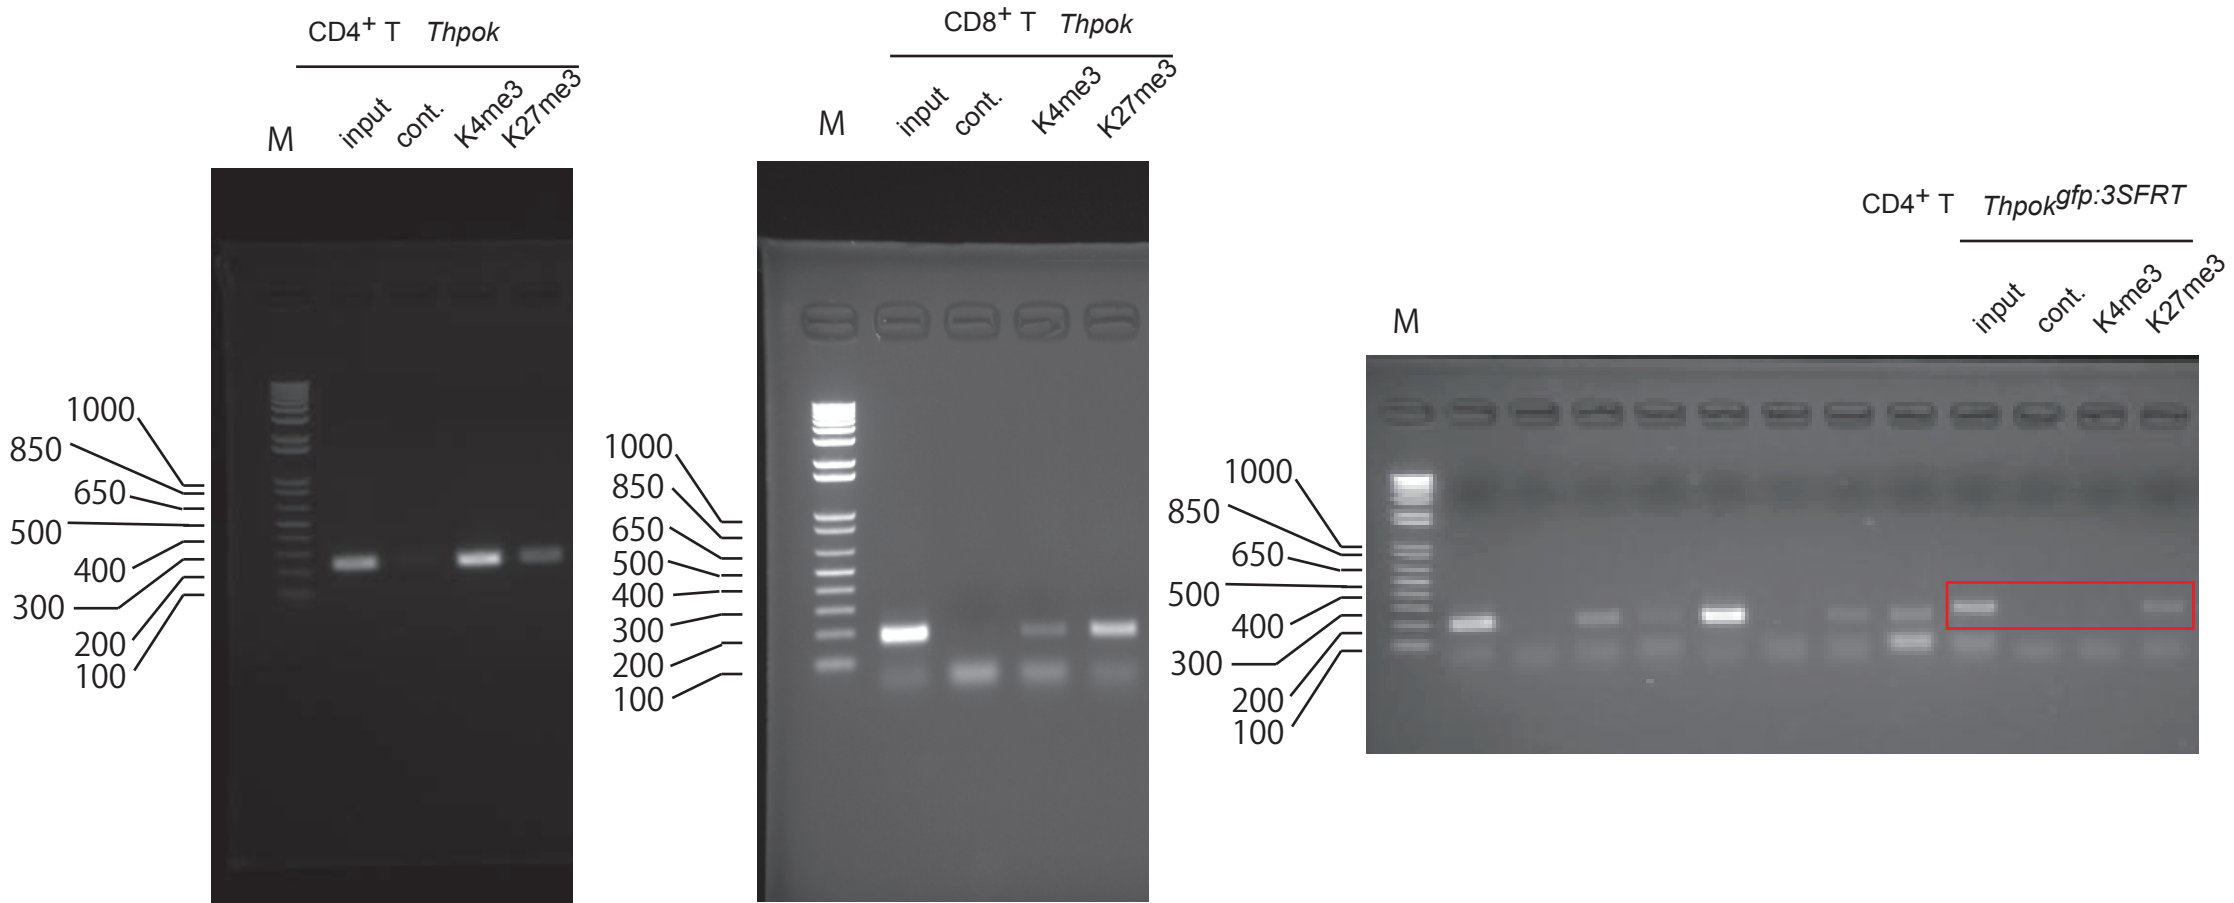

Supplement: emboj201347df5d.pdf [file emboj201347df5d.pdf]

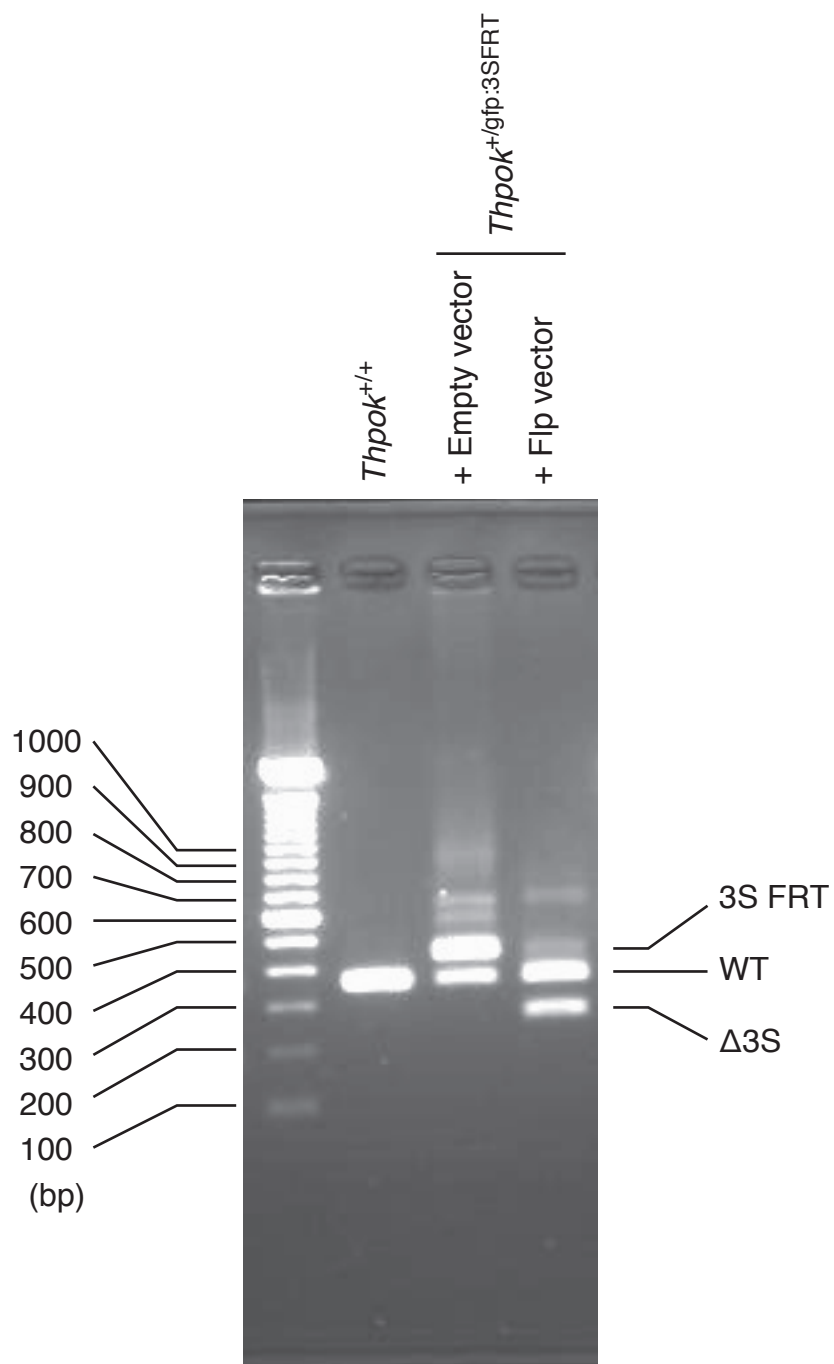

Supplement: emboj201347df5e.pdf [file emboj201347df5e.pdf]

Fig. 6C

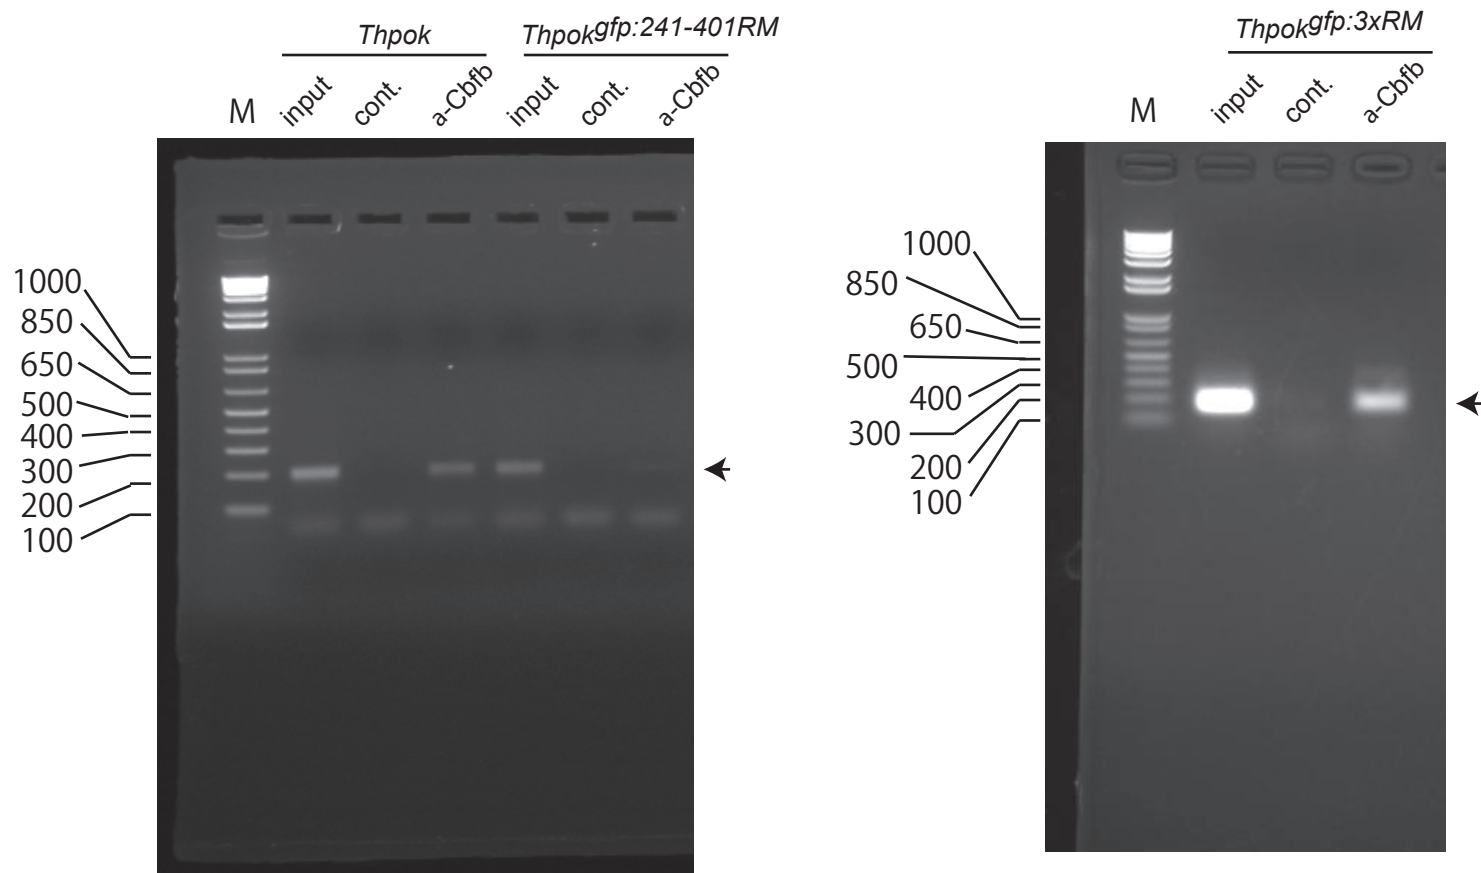

Supplement: emboj201347df6c.pdf [file emboj201347df6c.pdf]

Fig. 6D

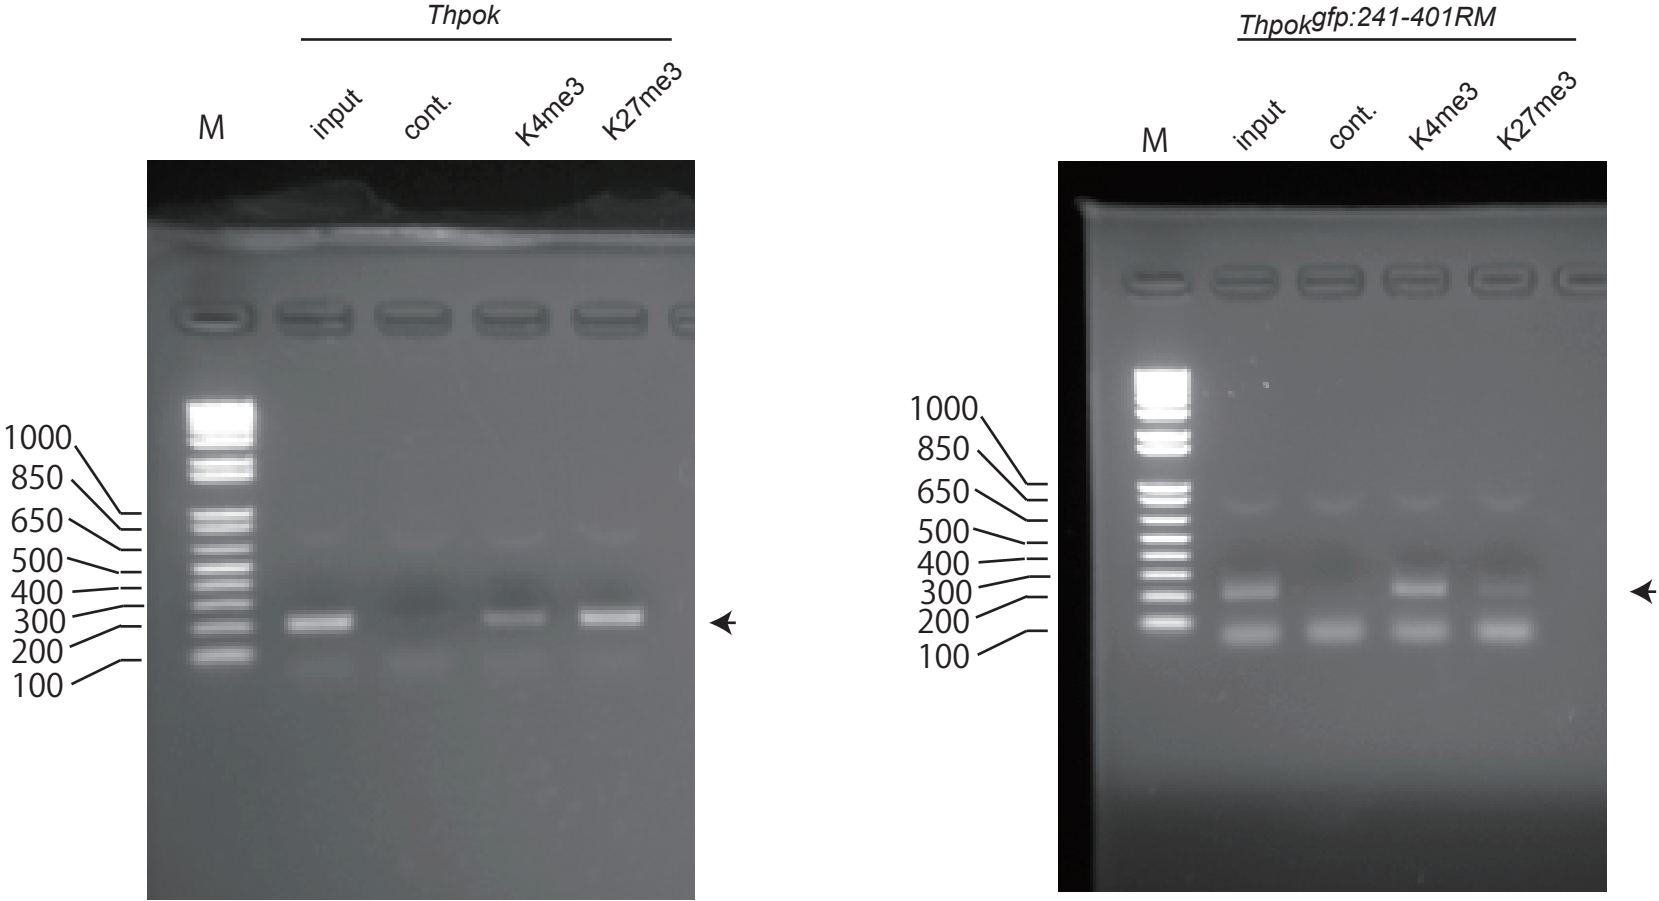

Supplement: emboj201347df6d.pdf [file emboj201347df6d.pdf]
